# Supplementary material
Source: MDPI journal article supplement (https://www.mdpi.com/2073-4395/13/12/2972)
Supplement: s1 [file s1]

**Table S1.** The substrate and buffer pH of enzyme assay.

| Enzyme                                | EC       | Substrate                                          | Buffer pH |
|---------------------------------------|----------|----------------------------------------------------|-----------|
| $\beta$ -glucosidase BG               | 3.2.1.21 | p-nitrophenyl- $\beta$ -glucopyranoside            | 6.0       |
| $\beta$ -N-acetyl glucosaminidase NAG | 3.2.1.52 | p-nitrophenyl-2-acetyl- $\beta$ -D-glucopyranoside | 5.5       |
| leucine aminopeptidase LAP            | 3.4.11.2 | L-Leucine-p-nitroanilide                           | 8.0       |
| alkaline phosphatase ALP              | 3.1.3.1  | p-nitrophenyl-phosphate disodium salt hexahydrate  | 9.5       |

**Table S2.** Soil water-stable aggregates size under different treatments of application manure. Mean value  $\pm$  standard deviations in the same column and depth followed by the different letters indicate significant difference at the 0.05 level (n = 4).

| Soil depth/cm | Treatments | Soil aggregates size/mm |                    |                     |                   |                    |
|---------------|------------|-------------------------|--------------------|---------------------|-------------------|--------------------|
|               |            | <0.25                   | 0.25-0.50          | 0.50-1.00           | 1.00-2.00         | >2.00              |
| 0-20          | CK         | 98.12 $\pm$ 0.39 a      | 0.53 $\pm$ 0.08 b  | 0.53 $\pm$ 0.13 c   | 0.31 $\pm$ 0.10 c | 0.51 $\pm$ 0.23 b  |
|               | 11a        | 60.44 $\pm$ 1.57 c      | 12.30 $\pm$ 0.40 a | 13.64 $\pm$ 0.83 a  | 9.08 $\pm$ 1.50 a | 4.55 $\pm$ 2.00 a  |
|               | 16a        | 73.43 $\pm$ 4.73 b      | 9.11 $\pm$ 3.39 a  | 9.04 $\pm$ 2.51 b   | 5.73 $\pm$ 1.54 b | 2.70 $\pm$ 0.36 ab |
|               | 22a        | 67.85 $\pm$ 7.25 bc     | 10.38 $\pm$ 2.82 a | 10.90 $\pm$ 4.93 ab | 5.28 $\pm$ 0.91 b | 5.59 $\pm$ 2.07 a  |
|               | 27a        | 69.91 $\pm$ 7.47 b      | 9.61 $\pm$ 0.55 a  | 9.55 $\pm$ 2.65 ab  | 5.19 $\pm$ 2.40 b | 5.74 $\pm$ 3.21 a  |
| 20-40         | CK         | 98.66 $\pm$ 0.42 a      | 0.56 $\pm$ 0.12 c  | 0.43 $\pm$ 0.19 c   | 0.26 $\pm$ 0.12 c | 0.09 $\pm$ 0.03 c  |
|               | 11a        | 62.61 $\pm$ 4.34 c      | 13.36 $\pm$ 1.96 a | 12.65 $\pm$ 1.71 a  | 8.57 $\pm$ 1.73 a | 2.81 $\pm$ 1.37 a  |
|               | 16a        | 80.02 $\pm$ 4.32 b      | 6.86 $\pm$ 1.64 b  | 8.53 $\pm$ 2.00 b   | 4.22 $\pm$ 2.00 b | 0.38 $\pm$ 0.15 bc |
|               | 22a        | 76.35 $\pm$ 4.44 b      | 9.00 $\pm$ 1.40 b  | 9.29 $\pm$ 4.03 ab  | 4.79 $\pm$ 1.47 b | 0.57 $\pm$ 0.11 bc |
|               | 27a        | 75.82 $\pm$ 4.08 b      | 7.84 $\pm$ 1.46 b  | 9.81 $\pm$ 1.47 ab  | 5.39 $\pm$ 1.04 b | 1.14 $\pm$ 0.29 b  |

**Table S3.** The soil physical properties under different treatments of application manure. Mean value  $\pm$  standard deviations in the same column and depth followed by the different letters indicate significant difference at the 0.05 level ( $n = 4$ ).

| Soil depth/cm | Treatments | $\rho_b$ (g cm <sup>-3</sup> ) | FC (%)             | $\rho_d$ (g cm <sup>-3</sup> ) | $f_t$ (%)           |
|---------------|------------|--------------------------------|--------------------|--------------------------------|---------------------|
| 0-20          | CK         | 1.49 $\pm$ 0.01 a              | 0.25 $\pm$ 0.01 d  | 2.39 $\pm$ 0.04 a              | 37.61 $\pm$ 0.79 b  |
|               | 11a        | 1.21 $\pm$ 0.05 b              | 0.39 $\pm$ 0.04 a  | 2.23 $\pm$ 0.07 b              | 50.58 $\pm$ 6.89 a  |
|               | 16a        | 1.24 $\pm$ 0.09 b              | 0.35 $\pm$ 0.03 ab | 2.22 $\pm$ 0.08 b              | 48.28 $\pm$ 2.61 a  |
|               | 22a        | 1.2 $\pm$ 0.03 b               | 0.33 $\pm$ 0.02 bc | 2.19 $\pm$ 0.09 b              | 47.03 $\pm$ 1.17 a  |
|               | 27a        | 1.19 $\pm$ 0.12 b              | 0.30 $\pm$ 0.01 c  | 2.12 $\pm$ 0.12 b              | 47.59 $\pm$ 1.70 a  |
| 20-40         | CK         | 1.49 $\pm$ 0.04 a              | 0.25 $\pm$ 0.00 c  | 2.35 $\pm$ 0.04 a              | 37.10 $\pm$ 3.33 c  |
|               | 11a        | 1.29 $\pm$ 0.02 bc             | 0.33 $\pm$ 0.02 a  | 2.28 $\pm$ 0.03 bc             | 43.12 $\pm$ 3.58 ab |
|               | 16a        | 1.38 $\pm$ 0.02 b              | 0.29 $\pm$ 0.02 b  | 2.32 $\pm$ 0.06 ab             | 39.83 $\pm$ 1.22 bc |
|               | 22a        | 1.22 $\pm$ 0.03 c              | 0.30 $\pm$ 0.01 b  | 2.23 $\pm$ 0.04 c              | 46.62 $\pm$ 1.21 a  |
|               | 27a        | 1.27 $\pm$ 0.03 c              | 0.29 $\pm$ 0.02 b  | 2.23 $\pm$ 0.03 c              | 42.4 $\pm$ 1.52 ab  |

**Table S4.** Soil saline-sodic properties under different treatments of application manure. Mean value  $\pm$  standard deviations in the same column and depth followed by the different letters indicate significant difference at the 0.05 level (n = 4).

| Soil depth/cm | Treatments | pH                 | EC <sub>1:5</sub> (dS m <sup>-1</sup> ) | ESP (%)            | SAR <sub>1:5</sub> ((mmol L <sup>-1</sup> ) <sup>1/2</sup> ) |
|---------------|------------|--------------------|-----------------------------------------|--------------------|--------------------------------------------------------------|
| 0-20          | CK         | 10.38 $\pm$ 0.04 a | 2.69 $\pm$ 0.73 a                       | 23.07 $\pm$ 3.59 a | 26.51 $\pm$ 5.18 a                                           |
|               | 11a        | 8.31 $\pm$ 0.06 b  | 0.37 $\pm$ 0.05 b                       | 3.29 $\pm$ 1.39 b  | 3.00 $\pm$ 0.75 b                                            |
|               | 16a        | 8.13 $\pm$ 0.09 c  | 0.27 $\pm$ 0.10 b                       | 0.56 $\pm$ 0.01 b  | 1.25 $\pm$ 0.15 b                                            |
|               | 22a        | 7.95 $\pm$ 0.01 d  | 0.31 $\pm$ 0.09 b                       | 0.52 $\pm$ 0.01 b  | 1.27 $\pm$ 0.30 b                                            |
|               | 27a        | 7.79 $\pm$ 0.16 d  | 0.28 $\pm$ 0.05 b                       | 0.53 $\pm$ 0.01 b  | 0.90 $\pm$ 0.36 b                                            |
| 20-40         | CK         | 10.21 $\pm$ 0.04 a | 1.90 $\pm$ 0.16 a                       | 19.63 $\pm$ 1.49 a | 25.08 $\pm$ 4.54 a                                           |
|               | 11a        | 8.33 $\pm$ 0.13 b  | 0.43 $\pm$ 0.09 b                       | 3.78 $\pm$ 1.42 b  | 3.17 $\pm$ 1.05 b                                            |
|               | 16a        | 8.15 $\pm$ 0.01 c  | 0.30 $\pm$ 0.05 b                       | 0.58 $\pm$ 0.03 c  | 0.83 $\pm$ 0.09 b                                            |
|               | 22a        | 7.86 $\pm$ 0.08 d  | 0.31 $\pm$ 0.02 b                       | 1.11 $\pm$ 0.04 c  | 0.86 $\pm$ 0.22 b                                            |
|               | 27a        | 7.80 $\pm$ 0.09 d  | 0.37 $\pm$ 0.14 b                       | 0.82 $\pm$ 0.34 c  | 0.76 $\pm$ 0.21 b                                            |

**Table S5.** The relationship between soil physical-chemical properties and EEAs. Stepwise multiple linear regression models (SMLR) used to identify the relationship between EEAs and soil physical-chemical properties. TN, total nitrogen; FC, field capacity; SC:N, soil C:N ratio; SAR, sodium adsorption ratio. BG,  $\beta$ -glucosidase; NAG,  $\beta$ -N-acetyl glucosaminidase; LAP, leucine aminopeptidase; ALP, alkaline phosphatase. The value of enzyme activity was expressed with logarithm.

| Stepwise multiple linear regression equations | R <sup>2</sup> | P      |
|-----------------------------------------------|----------------|--------|
| BG=5.136+1.385TN-5.270FC                      | 0.865          | p<0.01 |
| NAG+LAP=7.032+1.099TN+0.134SC:N               | 0.735          | p<0.01 |
| ALP=4.813+0.674TN-0.059SAR+0.107SC:N          | 0.680          | p<0.01 |

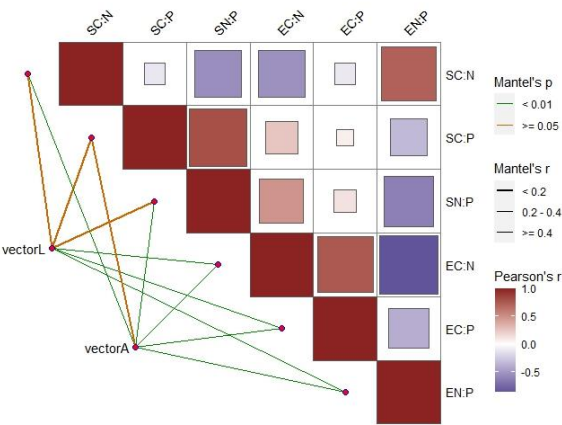

**Figure S1.** The relationship between soil C:N:P and enzymatic stoichiometry. SC:N, soil C:N ratio; SC:P, C:P ratio; SN:P, N:P ratio; EC:N, lnBG:ln(NAG+LAP); EC:P, lnBG:lnALP; EN:P, ln(NAG+LAP):lnALP; vector L, vector length; vector A, vector angle.
